# Supplementary material for: The North Italian Longitudinal Study Assessing the Mental Health Effects of SARS-CoV-2 Pandemic on Health Care Workers—Part I: Study Design and Psychometric Structural Validity of the HSE Indicator Tool and Work Satisfaction Scale
Source: Int J Environ Res Public Health. 2022 Aug 3;19(15):9514. doi: 10.3390/ijerph19159514 (PMC9368475; doi:10.3390/ijerph19159514)
Supplement: Supplementary file 1 [file ijerph-19-09514-s001.zip › ijerph-1804514-supplementary.pdf]

**The North Italian Longitudinal Study assessing the Mental Health effects of SARS-CoV-2 pandemic on Health Care Workers - Part I: study design and psychometric structural validity of the HSE Indicator Tool and work satisfaction scale**

**Giovanni Veronesi, Emanuele Maria Giusti, Alessia D'Amato, Francesco Gianfagna, Rossana Borchini, Gianluca Castelnovo, Licia Iacoviello, and Marco Mario Ferrario**

**Supplementary Tables**

**Table S1.** Assessing representativeness of the surveyed sample, by job title: medians and interquartile ranges (25<sup>th</sup>-75<sup>th</sup> percentiles) of turn-over, up/down sizing, overload, spell of short-term sick leaves, number of night shifts and night shifts regularity in recruited and non-recruited wards

| Job title                       | No. of wards | Turn-over          | Up/down sizing    | Overload       | Spell of short-term* sick leave | Night shifts      | Regular night shifts |
|---------------------------------|--------------|--------------------|-------------------|----------------|---------------------------------|-------------------|----------------------|
| <b>Physicians</b>               |              |                    |                   |                |                                 |                   |                      |
| <i>Recruited hospital wards</i> | 30           | 31.8 (0.0; 61.9)   | 0.0 (-9.9; 7.5)   | 3.0 (1.9; 4.1) | 62.6 (42.8; 88.1)               | 32.3 (16.0; 48.0) | 39.9 (28.5; 47.4)    |
| <i>Other hospital wards</i>     | 112          | 19.1 (0.0; 57.0)   | 0.0 (0.0; 9.6)    | 2.4 (0.8; 4.5) | 34.0 (0.0; 102.2)               | 16.2 (6.2; 40.1)  | 30.6 (7.6; 38.2)     |
| <i>p-value<sup>^</sup></i>      | -            | 0.33               | 0.76              | 0.47           | 0.03                            | 0.07              | 0.01                 |
| <b>Nurses</b>                   |              |                    |                   |                |                                 |                   |                      |
| <i>Recruited hospital wards</i> | 38           | 44.1 (18.9; 69.5)  | -1.7 (-10.9; 0.0) | 1.7 (1.0; 2.2) | 120.7 (87.7; 155.5)             | 79.9 (68.3; 85.5) | 96.7 (95.4; 98.2)    |
| <i>Other hospital wards</i>     | 166          | 34.2 (0.0; 78.5)   | 0.0 (-8.8; 0.0)   | 0.6 (0.3; 1.5) | 151.7 (72.5; 240.0)             | 81.9 (65.8; 92.9) | 98.0 (94.7; 99.5)    |
| <i>p-value<sup>^</sup></i>      | -            | 0.37               | 0.26              | 0.0003         | 0.18                            | 0.20              | 0.16                 |
| <b>Nurse assistants</b>         |              |                    |                   |                |                                 |                   |                      |
| <i>Recruited hospital wards</i> | 36           | 70.4 (22.8; 132.6) | 0.0 (0.0; 21.1)   | 1.0 (0.5; 1.3) | 183.1 (93.1; 281.6)             | 71.9 (15.6; 90.3) | 97.0 (92.8; 98.5)    |
| <i>Other hospital wards</i>     | 116          | 26.7 (0.0; 102.3)  | 0.0 (0.0; 0.0)    | 0.3 (0.0; 1.0) | 196.3 (90.3; 308.9)             | 77.9 (23.5; 93.5) | 98.7 (97.2; 99.8)    |
| <i>p-value<sup>^</sup></i>      | -            | 0.03               | 0.05              | 0.001          | 0.92                            | 0.39              | 0.11                 |
| <b>Administrative workers</b>   |              |                    |                   |                |                                 |                   |                      |
| <i>Recruited hospital wards</i> | 20           | 25.2 (0.0; 74.1)   | 0.0 (0.0; 0.0)    | 0.4 (0.2; 0.8) | 171.2 (118.4; 231.5)            | nr                | nr                   |
| <i>Other hospital wards</i>     | 101          | 0.0 (0.0; 49.3)    | 0.0 (0.0; 0.0)    | 0.5 (0.2; 1.2) | 119.5 (0.0; 225.6)              | nr                | nr                   |
| <i>p-value<sup>^</sup></i>      | -            | 0.04               | 0.37              | 0.34           | 0.08                            | -                 | -                    |

In the table: median (25th-75th percentile).

Turn-over: number per 100 HCWs. Up/down sizing: number per 100 HCWs; Overload: hours/week per HCW; Spell of short-term sick leave: number per 100 HCWs

Night shifts: number per HCW; Regular night shifts: percent

Metrics are referred to the period: 01/01/2018-30/04/2019 (prior to the pre-COVID-19 wave)

\*: < 3 days

<sup>^</sup>: Wilcoxon rank test

**Table S2:** Comparison between the results of the Principal Component Analysis and the results of the analyses performed by previous studies on the structural validity of the HSE

| Item #  | Item content                                                                          | Component in which the item loaded |                        |                   |
|---------|---------------------------------------------------------------------------------------|------------------------------------|------------------------|-------------------|
|         |                                                                                       | Cousins et al., 2004               | Magnavita et al., 2012 | This study        |
| Item 3  | Different groups at work demand things from me that are hard to combine               | Demands                            | Demands                | Demands           |
| Item 6  | I have unachievable deadlines                                                         | Demands                            | Demands                | Demands           |
| Item 9  | I have to work very intensively                                                       | Demands                            | Demands                | Demands           |
| Item 12 | I have to neglect some tasks because I have too much to do                            | Demands                            | Demands                | Demands           |
| Item 16 | I am unable to take sufficient breaks                                                 | Demands                            | Demands                | Demands           |
| Item 18 | I am pressured to work long hours                                                     | Demands                            | Demands                | Demands           |
| Item 20 | I have to work very fast                                                              | Demands                            | Demands                | Demands           |
| Item 22 | I have unrealistic time pressures                                                     | Demands                            | Demands                | Demands           |
| Item 2  | I can decide when to take a break                                                     | Control                            | Control                | Control           |
| Item 10 | I have a say in my own work speed                                                     | Control                            | Control                | Control           |
| Item 15 | I have a choice in deciding how I do my work                                          | Control                            | Control                | Control           |
| Item 19 | I have a choice in deciding what I do at work                                         | Control                            | Control                | Control           |
| Item 25 | I have some say over the way I work                                                   | Control                            | Control                | Control           |
| Item 7  | If work gets difficult, my colleagues will help me                                    | Peer support                       | Support                | Peer support      |
| Item 24 | I get help and support I need from colleagues                                         | Peer support                       | Support                | Peer support      |
| Item 27 | I receive the respect at work I deserve from my colleagues                            | Peer support                       | Support                | Peer support      |
| Item 31 | My colleagues are willing to listen to my work-related problems                       | Peer support                       | Support                | Peer support      |
| Item 8  | I am given supportive feedback on the work I do                                       | Managers' support                  | Elasticity             | Managers' support |
| Item 23 | I can rely on my line manager to help me out with a work problem                      | Managers' support                  | Elasticity             | Managers' support |
| Item 29 | I can talk to my line manager about something that has upset or annoyed me about work | Managers' support                  | Elasticity             | Managers' support |
| Item 35 | My line manager encourages me at work                                                 | Managers' support                  | Elasticity             | Managers' support |
| Item 1  | I am clear what is expected of me at work                                             | Role                               | Role                   | Role              |
| Item 4  | I know how to go about getting my job done                                            | Role                               | Role                   | Role              |

|         |                                                                              |                   |               |                                    |
|---------|------------------------------------------------------------------------------|-------------------|---------------|------------------------------------|
| Item 11 | I am clear what my duties and responsibilities are                           | Role              | Role          | Role                               |
| Item 13 | I am clear about the goals and objectives for my department                  | Role              | Role          | Role                               |
| Item 17 | I understand how my work fits into the overall aim of the organisation       | Role              | Role          | Role                               |
| Item 26 | I have sufficient opportunities to question managers about change at work    | Change            | Elasticity    | Participation in work organization |
| Item 28 | Staff are always consulted about change at work                              | Change            | Elasticity    | Participation in work organization |
| Item 30 | My working time can be flexible                                              | Control           | Elasticity    | Participation in work organization |
| Item 32 | When changes are made at work, I am clear how they will work out in practice | Change            | Elasticity    | Participation in work organization |
| Item 33 | I am supported through emotionally demanding work                            | Managers' support | Elasticity    | Participation in work organization |
| Item 5  | I am subject to personal harassment in the form of unkind words or behaviour | Relationships     | Relationships | Relationships                      |
| Item 14 | There is friction or anger between colleagues                                | Relationships     | Relationships | Relationships                      |
| Item 21 | I am subject to bullying at work                                             | Relationships     | Relationships | Relationships                      |
| Item 34 | Relationships at work are strained                                           | Relationships     | Relationships | Relationships                      |

---
